# Supplementary material for: Gastrointestinal Applications of Iodine Quantification Using Dual-Energy CT: A Systematic Review
Source: PubMed Central journal article supplement (PMC7602017; doi:10.3390/diagnostics10100814), 2020-10-13
Supplement: diagnostics-10-00814-s001.pdf [file diagnostics-10-00814-s001.pdf]

| Study               | Risk of Bias      |            |                    |                 |  | Applicability Concerns |            |                    |
|---------------------|-------------------|------------|--------------------|-----------------|--|------------------------|------------|--------------------|
|                     | PATIENT SELECTION | INDEX TEST | REFERENCE STANDARD | FLOW AND TIMING |  | FLOW AND TIMING        | INDEX TEST | REFERENCE STANDARD |
| Pan 2013 [36]       | 😊                 | 😊          | ?                  | 😊               |  | 😊                      | 😊          | 😊                  |
| Tang 2015 [45]      | 😊                 | 😊          | ?                  | 😊               |  | 😊                      | 😊          | 😊                  |
| Yang 2015 [40]      | 😊                 | 😊          | 😊                  | 😊               |  | 😊                      | 😊          | 😊                  |
| Peng 2016 [30]      | 😊                 | 😊          | 😊                  | 😊               |  | 😊                      | 😊          | 😊                  |
| Gong 2016 [48]      | 😊                 | ?          | ?                  | 😊               |  | 😊                      | 😊          | 😊                  |
| Winkhofer 2016 [63] | 😊                 | ?          | ?                  | 😊               |  | 😊                      | 😊          | 😊                  |
| Al-Najami 2017 [50] | ?                 | ?          | 😊                  | 😊               |  | 😊                      | 😊          | 😊                  |
| Chuang-bo 2017 [49] | 😊                 | 😊          | 😊                  | ?               |  | 😊                      | 😊          | 😊                  |
| Fan 2017 [53]       | 😊                 | 😊          | ?                  | 😊               |  | 😊                      | 😊          | 😊                  |
| Liang 2017 [37]     | 😊                 | 😊          | 😊                  | 😊               |  | 😊                      | 😊          | 😊                  |
| Chen 2017 [38]      | 😊                 | 😊          | 😊                  | 😊               |  | 😊                      | 😊          | 😊                  |
| Liu 2017 [46]       | ?                 | 😊          | ?                  | 😊               |  | 😊                      | 😊          | 😊                  |
| Meng 2017 [47]      | 😊                 | ?          | ☹️                 | ☹️              |  | 😊                      | 😊          | 😊                  |
| Yang 2018 [42]      | 😊                 | ?          | ?                  | 😊               |  | 😊                      | 😊          | 😊                  |
| Xie 2018 [41]       | 😊                 | 😊          | ?                  | 😊               |  | 😊                      | 😊          | 😊                  |
| Sun 2018 [52]       | 😊                 | 😊          | ?                  | 😊               |  | 😊                      | 😊          | 😊                  |
| Lourenco 2018 [62]  | 😊                 | 😊          | ?                  | 😊               |  | 😊                      | 😊          | 😊                  |
| Li 2018 [39]        | 😊                 | ?          | ?                  | 😊               |  | 😊                      | 😊          | 😊                  |
| Kang 2018 [54]      | 😊                 | ☹️         | ☹️                 | 😊               |  | 😊                      | 😊          | 😊                  |
| Kim 2018 [56]       | 😊                 | 😊          | 😊                  | ☹️              |  | 😊                      | 😊          | 😊                  |
| Ge 2018 [59]        | 😊                 | ?          | ?                  | 😊               |  | 😊                      | 😊          | 😊                  |
| Cheng 2018 [44]     | 😊                 | ☹️         | ?                  | 😊               |  | 😊                      | 😊          | 😊                  |
| Zhang 2019 [32]     | 😊                 | ?          | ?                  | 😊               |  | 😊                      | 😊          | 😊                  |
| Zhou 2019 [31]      | 😊                 | 😊          | ?                  | 😊               |  | 😊                      | 😊          | 😊                  |
| Yang 2019 [60]      | ?                 | ?          | ?                  | 😊               |  | 😊                      | 😊          | 😊                  |
| Wu 2019 [55]        | 😊                 | 😊          | ☹️                 | 😊               |  | 😊                      | 😊          | ?                  |
| Kupelli 2019 [43]   | 😊                 | 😊          | ?                  | ?               |  | 😊                      | 😊          | 😊                  |
| DeKock 2019 [58]    | ☹️                | ?          | 😊                  | ☹️              |  | 😊                      | 😊          | 😊                  |
| Al-Najami 2019 [51] | ?                 | 😊          | 😊                  | 😊               |  | 😊                      | 😊          | 😊                  |
| Dane 2020 [57]      | 😊                 | 😊          | ?                  | 😊               |  | 😊                      | 😊          | 😊                  |

**Figure S1.** Risk of bias and application concern assessment using the QUADAS-2 tool. Studies are listed chronologically based on publication year. Symbols defining the following: low (😊), high (☹️), or unclear (?).
